# Supplementary material
Source: publisher site journal article supplement (http://www.dovepress.com/get_supplementary_file.php?f=91439.xlsx)
Supplement: Supplementary file 1 [file get_supplementary_file.php]

## Sheet: Table2
Table 2: Lifetime Comorbidities of the Hungarian population with Relapsing Polychondritis. Above the diagonal are the numbers of patients affected by the disease pair between 2002 and 2013, time coincidence for the disease pair is not necessary. Pairwise p-values (p*100) below the diagonal, p<0.05 underlined. Disease groups are the same as in the network layout in Fig 1. For compactness, column h…
			1	2	3	4	5	6	7	8	9	10	11	12	13	14	15	16	17	18	19	20	21	22	23	24	25	26	27	28	29	30	31	32	33	34	35	36	37	38	39	40
			C00-D09	D10-D36	D37-D48	D50-D89	E00-E69	E70-E90	F00-F99	G00-G99	H00-H59*	H10-H13	H52	H60-H95*	H61	I00-I99*	I10	I20-I25	I30-I52	I70-I79	J30-J39	J40-J47	K00-K93	K20-K31	L00-L99*	L20-L30	L80-L99	M00-M99*	M15-M19	M20-M25	M47	M51	M54	M70-M79*	M79	M81	M94	N00-N99	R00-R99*	R00-R09	R10	R50-R69
			Malignant neoplasms	Benign neoplasms, except benign neuroendocrine tumors	Neoplasms of uncertain behavior, polycythemia vera and myelodysplastic syndromes	Diseases of the blood and blood-forming organs and certain disorders involving the immune mechanism	Endocrine, nutritional diseases	Metabolic disorders	Mental, Behavioral and Neurodevelopmental disorders	Diseases of the nervous system	Diseases of the eye and adnexa (except H10-H13 and H52)	Disorders of conjunctiva	Disorders of refraction and accommodation	Diseases of the ear and mastoid process (except H61)	Other disorders of external ear	Diseases of the circulatory system (except I10,I20-I25,I30-I52,I70-I79)	Essential (primary) hypertension	Ischemic heart diseases	Other forms of heart disease	Diseases of arteries, arterioles and capillaries	Other diseases of upper respiratory tract	Chronic lower respiratory diseases	Diseases of the digestive system (except K20-K31)	Diseases of esophagus, stomach and duodenum	Diseases of the skin and subcutaneous tissue (except L20-L30,L80-L99)	Dermatitis and eczema	Other disorders of the skin and subcutaneous tissue	Diseases of the musculoskeletal system and connective tissue (except M15-M25,M47,M51,M54,M70-M79,M81,M94)	Osteoarthritis	Other joint disorders	Spondylosis	Thoracic, thoracolumbar, and lumbosacral intervertebral disc disorders	Dorsalgia	Other soft tissue disorders	Other and unspecified soft tissue disorders, not elsewhere classified	Osteoporosis without current pathological fracture	Relapsing polychondritis	Diseases of the genitourinary system	Symptoms, signs and abnormal clinical and laboratory findings, not elsewhere classified (except R00-R09,R10,R50-R69)	Symptoms and signs involving the circulatory and respiratory systems	Abdominal and pelvic pain	General symptoms and signs
1	C00-D09	Malignant neoplasms		34	32	31	41	27	28	33	50	30	45	40	30	49	55	37	43	31	37	36	48	38	31	34	34	54	42	37	44	36	37	27	29	28	64	56	50	43	32	40
2	D10-D36	Benign neoplasms, except benign neuroendocrine tumors	20		28	45	76	43	58	53	71	54	77	69	53	64	84	52	53	45	66	54	82	61	59	61	50	91	69	65	75	66	65	51	48	53	108	91	78	67	70	66
3	D37-D48	Neoplasms of uncertain behavior, polycythemia vera and myelodysplastic syndromes	0	17		27	31	22	24	27	38	23	31	31	21	36	44	29	30	30	26	28	39	32	27	25	22	44	30	30	34	28	34	24	20	21	51	42	37	28	29	29
4	D50-D89	Diseases of the blood and blood-forming organs and certain disorders involving the immune mechanism	4.9	31	1.5		61	43	43	48	62	45	60	55	50	62	76	46	55	49	57	42	66	49	52	49	45	82	56	52	55	39	52	42	34	48	89	77	66	57	50	63
5	E00-E69	Endocrine, nutritional diseases	16	0	50	0.4		64	74	79	93	62	94	84	66	88	115	68	72	59	91	59	102	77	68	80	62	119	93	76	90	73	77	69	56	70	132	117	101	87	80	87
6	E70-E90	Metabolic disorders	72	88	65	5.2	0.4		54	56	70	42	65	65	50	70	88	55	58	44	58	42	70	51	55	51	49	85	68	57	68	52	59	49	45	51	94	80	74	60	53	66
7	F00-F99	Mental, Behavioral and Neurodevelopmental disorders	29	22	71	80	2	4.3		75	82	53	80	71	58	75	93	60	56	47	67	48	83	65	55	62	49	104	78	76	87	76	80	64	51	57	115	99	84	73	67	69
8	G00-G99	Diseases of the nervous system	62	97	52	23	0	0.8	0		79	61	86	81	54	83	98	68	62	56	70	51	85	66	54	59	50	108	86	68	87	71	74	56	50	55	114	98	86	67	71	76
9	H00-H59*	Diseases of the eye and adnexa (except H10-H13 and H52)	0.3	37	5	8.4	0.5	0.3	0.8	4.1		76	115	98	72	96	124	81	82	68	91	72	108	81	75	74	67	132	100	82	102	83	89	70	61	79	146	123	107	86	79	87
10	H10-H13	Disorders of conjunctiva	56	7.6	83	10	26	82	48	0.4	0.1		82	71	62	67	84	52	52	45	61	46	75	58	55	52	46	90	73	60	70	54	61	54	39	59	102	92	73	61	60	60
11	H52	Disorders of refraction and accommodation	45	15	33	82	8.4	49	33	0.5	0	0		105	79	99	129	76	79	67	87	72	112	79	82	79	75	139	112	89	112	96	94	78	65	85	155	134	111	88	79	87
12	H60-H95*	Diseases of the ear and mastoid process (except H61)	39	8.8	64	35	4.5	0.5	25	0	0	0.2	0		80	90	113	67	71	66	87	66	98	67	67	68	63	122	89	82	94	80	83	60	55	70	135	115	92	77	82	86
13	H61	Other disorders of external ear	73	25	53	0.8	8.4	4.1	10	49	9.2	0	1.1	0		63	84	50	57	45	69	46	76	52	62	59	49	94	65	56	71	55	61	50	36	53	105	94	74	66	60	64
14	I00-I99*	Diseases of the circulatory system (except I10,I20-I25,I30-I52,I70-I79)	0.1	80	4.7	0.6	0.4	0	3.7	0	0.3	4.6	1.7	0.3	65		120	77	83	67	73	65	105	77	66	71	67	124	97	75	98	79	80	66	61	67	136	116	98	82	76	84
15	I10	Essential (primary) hypertension	4.6	75	7.6	1.7	0	0	15	0.2	0	8	0.1	0.4	30	0		98	98	80	107	87	129	90	87	93	83	160	118	96	125	98	102	87	73	96	179	149	125	111	99	101
16	I20-I25	Ischemic heart diseases	0.9	21	3.5	5.7	0.7	0	1.1	0	0	5.1	2.4	3.5	28	0	0		72	52	65	57	79	60	45	51	50	93	74	60	77	61	62	48	42	55	102	88	78	65	59	61
17	I30-I52	Other forms of heart disease	0	68	7.2	0.1	1.6	0.1	75	4.4	0.1	37	15	7.6	6.7	0	0	0		59	70	52	85	64	56	56	53	101	80	68	71	55	65	51	41	54	111	94	82	69	55	69
18	I70-I79	Diseases of arteries, arterioles and capillaries	14	80	0.4	0.1	16	12	98	1.2	2	36	28	0.3	56	0.2	2.9	0.5	0		53	50	68	56	51	50	53	90	68	55	67	49	64	42	37	50	95	78	75	57	48	59
19	J30-J39	Other diseases of upper respiratory tract	83	20	36	7.4	0	20	62	15	2.4	39	82	0.5	1.2	28	8.2	5.5	6	83		67	101	71	70	76	56	117	86	81	87	73	78	60	49	67	132	111	91	88	76	82
20	J40-J47	Chronic lower respiratory diseases	1	3.2	4.4	25	44	58	82	50	0.7	48	8.6	2.1	71	5.3	0.1	0	20	1	0.4		71	60	55	52	44	90	60	52	70	59	62	42	41	47	99	78	69	62	55	58
21	K00-K93	Diseases of the digestive system (except K20-K31)	13	1	12	8.4	0	5.9	12	2.3	0.6	7.9	2.6	4.7	14	0	0.6	0.4	0.5	26	0.1	23		92	83	83	73	137	105	89	112	93	95	73	66	73	157	135	109	95	95	101
22	K20-K31	Diseases of esophagus, stomach and duodenum	2.3	0.9	1.3	6	0	7.7	0.5	0.2	0.1	1	11	39	52	0.1	8.9	0.2	0.3	0.3	2.2	0.1	0		52	61	53	101	79	68	79	65	73	56	45	58	110	101	89	75	76	69
23	L00-L99*	Diseases of the skin and subcutaneous tissue (except L20-L30,L80-L99)	99	8.2	47	1.8	29	1.2	84	74	26	14	5.9	69	0.4	99	95	24	57	19	11	6.5	5.6	72		75	63	100	67	61	73	63	60	52	48	50	113	96	78	68	62	70
24	L20-L30	Dermatitis and eczema	34	1.7	88	9.4	0	12	7.9	27	30	43	21	41	2.5	14	3.2	60	49	25	0.1	24	3.6	3.3	0		61	96	69	67	75	66	64	58	43	51	112	99	80	73	63	66
25	L80-L99	Other disorders of the skin and subcutaneous tissue	1.9	11	70	1.7	2.9	0.4	57	35	4	24	0.1	3.2	9.8	0.2	0.2	2.4	4	0	56	33	1.1	3	0	0		86	67	58	64	52	56	46	45	52	95	86	71	62	52	65
26	M00-M99*	Diseases of the musculoskeletal system and connective tissue (except M15-M25,M47,M51,M54,M70-M79,M81,M94)	37	16	75	10	17	28	19	0.2	9.1	78	17	13	41	5.1	13	14	13	0.9	57	19	85	6.7	67	41	26		136	112	145	118	119	100	86	101	204	163	136	114	110	117
27	M15-M19	Osteoarthritis	41	46	67	70	0.1	0.5	4.7	0	0.4	0.5	0	9.5	88	0	1	0.2	0.2	0.8	18	84	1.4	0.2	53	94	1.8	0		91	115	96	97	79	64	82	143	124	102	85	80	85
28	M20-M25	Other joint disorders	31	2.7	30	15	6.9	3.8	0	3	13	8.2	3	0.3	79	31	48	8.2	1	16	0.2	97	5.8	0.7	63	2.9	2.8	4.3	0		85	71	78	71	59	67	122	112	91	78	75	75
29	M47	Spondylosis	66	38	98	23	54	12	0.4	0.2	16	55	1	24	75	3.5	5.3	1.1	43	28	82	25	2.6	11	55	89	82	0	0	29		110	109	86	76	84	155	126	103	92	91	87
30	M51	Thoracic, thoracolumbar, and lumbosacral intervertebral disc disorders	62	3.4	84	1.9	56	67	0	1	21	85	0	4.5	73	11	54	9.7	23	60	56	12	1.5	12	53	12	78	0.1	0	15	0		98	65	61	65	125	102	84	74	74	72
31	M54	Dorsalgia	53	11	5.1	35	18	3.8	0	0.2	1.1	15	0.9	1.3	32	12	17	9	24	0.1	11	3.3	0.9	0.1	68	44	26	0.3	0	0.3	0	0		70	60	70	127	112	96	79	77	80
32	M70-M79*	Other soft tissue disorders	53	62	80	68	1.8	9.5	0.2	28	33	4.5	3.8	71	56	27	8.5	67	89	74	99	42	66	12	88	6.4	46	0.7	0	0	0	3.3	0.1		59	58	106	96	75	65	61	67
33	M79	Other and unspecified soft tissue disorders, not elsewhere classified	30	19	91	67	37	4.2	17	23	45	64	37	76	11	6.9	62	73	38	80	32	69	34	77	44	65	5.5	7	5.8	0.6	0	0.3	1.3	0		51	93	77	65	52	53	58
34	M81	Osteoporosis without current pathological fracture	80	25	53	3.3	0.6	2.1	17	34	0	0.1	0	1.5	13	13	0	1.7	29	5.5	4.7	53	53	2.7	81	89	1.4	0.1	0	0.2	0	2.3	0.1	0.7	1.5		105	89	76	68	60	64
35	M94	Relapsing polychondritis																																				184	147	129	121	128
36	N00-N99	Diseases of the genitourinary system	5.4	6.8	50	2.9	0	6.1	1	1.2	1.2	0	0	0.7	0.1	0.6	0.4	1.8	4.3	33	3	95	0	0	3.1	0.1	0.1	36	0	0	22	29	0	0	24	5.2			130	107	108	113
37	R00-R99*	Symptoms, signs and abnormal clinical and laboratory findings, not elsewhere classified (except R00-R09,R10,R50-R69)	0.4	0.8	12	0.6	0	0	0.2	0	0	1.9	0	6.1	3.5	0.1	0	0	0.1	0	3.5	7.3	0.4	0	6.9	1.2	0.3	0.4	0.1	0	13	16	0	2.8	8.1	0.8		0		0	83	95
38	R00-R09	Symptoms and signs involving the circulatory and respiratory systems	2.7	5.8	94	3.7	0	3.3	1.4	31	16	23	54	55	3.8	7.4	0	2.4	4.7	24	0	5.6	2.4	0	15	0.4	1.2	67	12	0.6	8.5	21	2.2	9.6	89	0.9		9.9	96		74	80
39	R10	Abdominal and pelvic pain	72	0	43	31	0.3	26	5.7	0.2	39	6.4	68	0.2	15	15	6.2	11	49	72	4.9	34	0	0	38	20	48	11	12	0.2	0.4	1.7	0.4	12	21	15		0	7.1	6.5		79
40	R50-R69	General symptoms and signs	15	7.9	75	0	0	0	13	0.1	6.5	29	61	0.2	9.5	1.4	41	19	3.5	6.9	1.2	34	0	2.4	3.8	24	0.1	5.3	8.2	3.6	61	38	0.7	2.1	6.4	9.5		0	0	1.6	0.1

## Sheet: Table3
Table 3: Same-Day-Comorbidities of the Hungarian population with Relapsing Polychondritis. Above the diagonal are the numbers of patients affected by the disease pair between 2002 and 2013, where pairs occurred at the same day. Pairwise p-values (p*100) below the diagonal, p<0.05 underlined. Disease groups are the same as in the network layout in Fig 2. For compactness, column headings contain on…
			1	2	3	4	5	6	7	8	9	10	11	12	13	14	15	16	17	18	19	20	21	22	23	24	25	26	27	28	29	30	31	32	33	34	35	36	37	38	39	40
			C00-D09	D10-D36	D37-D48	D50-D89	E00-E69	E70-E90	F00-F99	G00-G99	H00-H59*	H10-H13	H52	H60-H95*	H61	I00-I99*	I10	I20-I25	I30-I52	I70-I79	J30-J39	J40-J47	K00-K93	K20-K31	L00-L99*	L20-L30	L80-L99	M00-M99*	M15-M19	M20-M25	M47	M51	M54	M70-M79*	M79	M81	M94	N00-N99	R00-R99*	R00-R09	R10	R50-R69
			Malignant neoplasms	Benign neoplasms, except benign neuroendocrine tumors	Neoplasms of uncertain behavior, polycythemia vera and myelodysplastic syndromes	Diseases of the blood and blood-forming organs and certain disorders involving the immune mechanism	Endocrine, nutritional diseases	Metabolic disorders	Mental, Behavioral and Neurodevelopmental disorders	Diseases of the nervous system	Diseases of the eye and adnexa (except H10-H13 and H52)	Disorders of conjunctiva	Disorders of refraction and accommodation	Diseases of the ear and mastoid process (except H61)	Other disorders of external ear	Diseases of the circulatory system (except I10,I20-I25,I30-I52,I70-I79)	Essential (primary) hypertension	Ischemic heart diseases	Other forms of heart disease	Diseases of arteries, arterioles and capillaries	Other diseases of upper respiratory tract	Chronic lower respiratory diseases	Diseases of the digestive system (except K20-K31)	Diseases of esophagus, stomach and duodenum	Diseases of the skin and subcutaneous tissue (except L20-L30,L80-L99)	Dermatitis and eczema	Other disorders of the skin and subcutaneous tissue	Diseases of the musculoskeletal system and connective tissue (except M15-M25,M47,M51,M54,M70-M79,M81,M94)	Osteoarthritis	Other joint disorders	Spondylosis	Thoracic, thoracolumbar, and lumbosacral intervertebral disc disorders	Dorsalgia	Other soft tissue disorders	Other and unspecified soft tissue disorders, not elsewhere classified	Osteoporosis without current pathological fracture	Relapsing polychondritis	Diseases of the genitourinary system	Symptoms, signs and abnormal clinical and laboratory findings, not elsewhere classified (except R00-R09,R10,R50-R69)	Symptoms and signs involving the circulatory and respiratory systems	Abdominal and pelvic pain	General symptoms and signs
1	C00-D09	Malignant neoplasms		6	9	16	10	4	4	4	5	NA	3	3	2	9	20	13	12	9	4	11	10	8	4	4	5	8	10	3	3	4	3	1	3	2	9	12	11	5	4	8
2	D10-D36	Benign neoplasms, except benign neuroendocrine tumors	0.1		2	3	4	1	6	5	5	2	2	7	4	9	7	1	1	4	3	2	6	7	13	13	20	14	4	6	5	2	4	4	1	2	8	15	5	1	3	3
3	D37-D48	Neoplasms of uncertain behavior, polycythemia vera and myelodysplastic syndromes	8.9	81		8	6	1	3	3	3	NA	NA	1	1	1	9	4	4	4	2	5	5	6	2	2	3	9	3	NA	3	3	2	2	1	NA	9	11	6	1	NA	2
4	D50-D89	Diseases of the blood and blood-forming organs and certain disorders involving the immune mechanism	0	22	0		21	15	9	11	9	2	4	5	7	20	34	19	17	14	6	16	20	17	6	5	8	30	10	2	8	6	2	2	4	5	25	27	14	11	5	11
5	E00-E69	Endocrine, nutritional diseases	12	0.1	78	0		36	25	22	27	10	20	14	9	36	63	27	33	26	16	22	33	23	8	13	13	47	29	12	24	28	20	8	10	16	37	34	20	17	6	19
6	E70-E90	Metabolic disorders	88	4.3	71	0	0		21	23	9	2	2	7	5	29	54	27	26	19	4	16	27	13	5	3	8	34	7	5	20	17	9	5	7	11	23	21	14	14	7	10
7	F00-F99	Mental, Behavioral and Neurodevelopmental disorders	0	1.6	3.4	0.3	0.2	0		38	14	3	7	18	1	25	39	19	10	10	5	14	17	20	6	5	6	42	20	9	28	39	19	13	10	12	24	29	19	9	6	20
8	G00-G99	Diseases of the nervous system	31	6.8	61	34	40	0	0		18	4	6	20	4	37	44	23	13	16	9	12	12	13	6	2	8	41	23	11	35	36	25	10	10	11	25	19	24	6	4	16
9	H00-H59*	Diseases of the eye and adnexa (except H10-H13 and H52)	0	0	2.5	7.6	0	0	0	3.3		39	87	13	11	18	41	12	12	11	15	12	19	9	10	10	6	36	10	8	13	16	5	6	3	14	27	8	8	7	1	14
10	H10-H13	Disorders of conjunctiva	NA	21	NA	5.7	0	10	0.1	0.2	0		33	6	5	3	12	2	3	6	8	6	5	3	3	5	NA	12	3	1	5	4	NA	5	NA	5	11	3	3	2	NA	4
11	H52	Disorders of refraction and accommodation	0	2.9	NA	0.6	0.1	0.6	0	0	0	0		11	6	8	28	2	3	5	9	6	3	4	4	3	1	23	7	3	8	15	5	2	NA	7	12	3	8	4	1	9
12	H60-H95*	Diseases of the ear and mastoid process (except H61)	0	24	8.7	0.9	6.3	33	30	0.8	2.3	0	12		42	14	24	7	1	9	22	10	12	4	8	6	5	23	12	5	16	10	7	4	6	6	22	19	23	4	NA	13
13	H61	Other disorders of external ear	0.2	30	22	73	0	0	3.5	0.1	0.1	74	9.3	0		5	12	4	4	4	21	4	6	5	4	5	6	17	4	2	5	3	1	2	2	5	14	5	7	5	2	7
14	I00-I99*	Diseases of the circulatory system (except I10,I20-I25,I30-I52,I70-I79)	24	7	3.3	0	0	0	0.2	0	0	0.2	0	88	87		58	31	31	24	9	18	37	12	7	8	14	39	16	10	22	21	9	4	8	16	21	30	27	13	9	12
15	I10	Essential (primary) hypertension	0.1	0.2	5.2	0	0	0	27	0	0	1	5.2	33	5	0		65	52	35	13	38	45	34	13	14	20	75	34	15	49	33	30	10	15	13	58	49	41	39	18	31
16	I20-I25	Ischemic heart diseases	0	1.3	3.1	0	0	0	93	0	0.1	2.7	0	0.1	0.7	0	0		44	20	7	27	25	15	3	4	8	31	15	8	26	17	11	4	8	7	17	21	18	17	3	8
17	I30-I52	Other forms of heart disease	0	2.2	96	0	0	0	0.1	11	32	34	0.1	0.2	20	0	0	0		20	10	22	25	13	3	4	7	31	9	3	14	8	5	5	6	5	27	22	19	16	1	7
18	I70-I79	Diseases of arteries, arterioles and capillaries	1.4	16	64	0	0	0	3.2	11	0	0.3	0	0	0	0	0	0	0		4	16	13	9	7	4	7	29	13	5	15	15	7	2	4	4	24	12	18	7	1	7
19	J30-J39	Other diseases of upper respiratory tract	0	1.5	11	0.6	0	2.4	0	0	0	0	2.9	0	0	0	0	0	1.1	0.1		34	9	14	9	9	2	24	8	3	11	9	8	5	1	5	20	13	10	17	2	14
20	J40-J47	Chronic lower respiratory diseases	7.1	0.2	49	19	0	0	2	0.3	2.3	0	0	0.3	88	15	0	0	0	0	0		13	23	5	8	6	28	11	6	15	17	9	6	6	7	22	19	18	24	2	13
21	K00-K93	Diseases of the digestive system (except K20-K31)	1.1	9.7	0	0	0	0	1.1	0.5	70	4.7	0	11	30	0	0	0	0	0.1	0.1	30		37	5	9	9	41	12	3	19	19	10	2	4	12	26	37	26	7	27	17
22	K20-K31	Diseases of esophagus, stomach and duodenum	3.5	93	0.5	0	0	0	0	70	0.4	6.8	0.8	36	0.3	0	0	0	8.3	0	12	0	0		4	5	8	36	13	5	19	19	9	7	4	7	23	22	16	14	11	12
23	L00-L99*	Diseases of the skin and subcutaneous tissue (except L20-L30,L80-L99)	17	0	35	57	10	4.4	0	0.4	0	8.9	2.2	26	97	10	42	17	47	0	29	0.1	0.9	88		20	17	18	6	3	7	7	7	3	4	4	13	10	4	2	3	11
24	L20-L30	Dermatitis and eczema	0.7	0	54	14	86	4.2	0	0	0.1	61	1.5	79	90	0	50	44	31	42	70	5.4	29	92	0		20	12	4	NA	3	5	2	NA	2	1	14	7	6	5	1	6
25	L80-L99	Other disorders of the skin and subcutaneous tissue	45	0	37	37	89	0	0.1	0.7	0	NA	2	17	15	15	73	48	0.8	0	1	3.4	18	70	0	0		19	3	NA	7	6	1	4	2	4	13	14	3	7	2	8
26	M00-M99*	Diseases of the musculoskeletal system and connective tissue (except M15-M25,M47,M51,M54,M70-M79,M81,M94)	0	0	34	0	70	0	37	4	0	0	0	0	1	31	1.4	50	0	0	0	0	0	0	0	0	0		84	52	96	79	62	54	38	46	93	42	36	19	9	25
27	M15-M19	Osteoarthritis	0	0	0.4	0	3.5	0	10	70	0	0	0	0	0	61	44	28	0	0	0	0	5.2	70	0	0	0	0		44	72	55	49	38	21	32	27	15	15	5	2	13
28	M20-M25	Other joint disorders	0.1	18	NA	6.8	0	47	48	63	0	2.7	0.2	0	0.4	23	0.2	81	0.3	11	0	0	0	47	0.2	NA	NA	0	0		28	25	22	32	12	8	14	10	7	2	2	5
29	M47	Spondylosis	0	0	0.2	0	0	0	0	0	0	0	0	0	6.1	0	0	0.9	0.7	91	0	0	0	0	0	0	0	0	0	2.7		80	65	38	34	30	29	26	21	11	5	12
30	M51	Thoracic, thoracolumbar, and lumbosacral intervertebral disc disorders	0	0	0.1	0	0	0	0	0	0	0	0	0.3	0	0	0.1	0	0	21	0	0	0	0	0	0	0	0	0	0	0		64	31	29	20	36	20	12	8	4	10
31	M54	Dorsalgia	0	0	0.8	0	0	11	0.6	5.9	0	NA	0	0	0	0	1.3	0	0	0	0	0	0	12	0	0	0.1	0	0	0	0	0		22	20	16	17	21	6	5	2	5
32	M70-M79*	Other soft tissue disorders	0	0.7	5.6	0.2	0	0.2	0	3.9	0	3.3	0	0	0.1	0	0	0.9	0	0	0	0	0	17	0	NA	43	0	0	0	0	0	0		18	11	13	9	7	4	2	1
33	M79	Other and unspecified soft tissue disorders, not elsewhere classified	0.3	5.5	22	13	3	16	11	29	0	NA	NA	0	2.6	0.2	12	87	6.8	9.7	0.9	0.1	0.3	17	4.1	3.6	65	0	3.1	0	0	0	0	0		8	7	7	5	5	2	1
34	M81	Osteoporosis without current pathological fracture	0	1.7	NA	3.1	29	0	69	0.1	0.2	14	1.8	0.2	44	0	9.8	0	20	3.6	0.2	0	60	0	0.3	0.8	3.2	0	0	0	0	0	28	0	0		20	15	10	5	1	2
35	M94	Relapsing polychondritis	0	0.1	0	0	0	0	0	6.3	0.1	0	0	0	0.2	83	0	0.1	0	0	2.2	0	0	0	1.5	21	27	0	0	80	4.3	3.3	0	2.4	0	36		32	24	11	4	16
36	N00-N99	Diseases of the genitourinary system	0	97	0.1	0	0	0	0	0	0	3.6	0	0	0	52	0	1.4	76	0.1	0	0	70	17	0	0	1.3	0	0	0	0	0	0	0	0	0.1	4.2		39	10	25	21
37	R00-R99*	Symptoms, signs and abnormal clinical and laboratory findings, not elsewhere classified (except R00-R09,R10,R50-R69)	0.4	31	1.2	0	0	0.1	1.8	0	0.3	16	73	0	0.1	0	0	0	0	0	7.3	0.1	0	0	1.8	97	13	23	0	1.6	0.2	0	0	0.2	7	17	0	0		4.5	8	18
38	R00-R09	Symptoms and signs involving the circulatory and respiratory systems	33	11	36	19	0.1	0	11	68	0.1	35	23	19	99	40	0	0	0	22	0	0	12	0	15	82	25	0	0	1.5	43	0	0	1.6	44	21	1.3	72	10		4	8
39	R10	Abdominal and pelvic pain	8.5	70	NA	96	7.5	9	3.6	0.7	0.3	NA	4.4	NA	16	0.6	28	9.1	3.9	6	2.5	0.6	0	0.4	39	11	32	0	1	4.3	0	0	0.1	1	16	3.1	0.4	0	26	98		7
40	R50-R69	General symptoms and signs	67	18	34	0.8	55	0	0	0	30	49	58	0.1	77	6.4	0.2	65	12	29	88	0	0.9	0.2	0.3	52	0	62	36	0.6	17	0	0	0.1	1.5	2.5	0.2	9.9	0	17	45
